# Supplementary material for: Absorption and transport properties of a codfish-derived peptide and its protective effect on bone loss in ovariectomized mice
Source: Royal Society of Chemistry journal article supplement (doi:10.1039/d3fo04819e), 2024-01-01

## **Absorption and transport properties of a Codfish-derived peptide and its protective effect on bone loss in ovariectomized mice**

Meilian Yang<sup>a, 1</sup>, Shengpeng Su<sup>b, 1</sup>, Shuzhen Cheng<sup>a</sup>, Zhenyu Wang<sup>a</sup>, Ming Du<sup>a, \*</sup>

<sup>a</sup> School of Food Science and Technology, National Engineering Research Center of Seafood, Collaborative Innovation Center of Seafood Deep Processing, SKL of Marine Food Processing & Safety Control, Dalian Polytechnic University, Dalian 116034, China.

<sup>b</sup> Inner Mongolia Enterprise Key Laboratory of Dairy Nutrition, Health & Safety, Inner Mongolia Mengniu Dairy (Group) Co., Ltd., Huhhot 011500, P.R. China.

<sup>1</sup> These authors have contributed equally to this work.

\* Corresponding Authors: Prof. Ming Du (E-mail: [duming@dlpu.edu.cn](mailto:duming@dlpu.edu.cn);

Fax: +86-411-86323262; Tel: +86-411-86332275)

**Table S1.** Identification method of the P-GM-2 by UPLC-QTRAP.

| <b>Q1 Mass (Da)</b> | <b>Q3 Mass (Da)</b> | <b>Time (msec)</b> | <b>DP (volts)</b> | <b>CE (volts)</b> |
|---------------------|---------------------|--------------------|-------------------|-------------------|
| 715.200             | 187.300             | 100.0              | 200.000           | 45.000            |
| 715.200             | 284.200             | 100.0              | 200.000           | 50.800            |
| 715.200             | 529.300             | 100.0              | 200.000           | 44.100            |

**Table S2.** Blood routine analysis of mice in each group.

| Parameters         | Sham         | OVX          | OVX+TPTD      | OVX+P-GM-2  |
|--------------------|--------------|--------------|---------------|-------------|
| WBC( $10^9/L$ )    | 7.89±1.75    | 8.96±1.92    | 8.31±0.94     | 6.25±0.54   |
| RBC( $10^{12}/L$ ) | 10.33±0.25   | 10.62±0.02   | 5.35±1.64*    | 10.56±0.16  |
| HGB(g/L)           | 162.50±4.50  | 169.40±1.90  | 89.50±10.18*  | 163.50±4.30 |
| MCV(fL)            | 52.65±14.12  | 53.35±0.25   | 48.65±0.65    | 52.45±0.55  |
| PLT( $10^9/L$ )    | 495.19±14.40 | 541.40±21.30 | 375.57±25.52* | 511.54±7.53 |
| Lym(%)             | 93.65±2.25   | 90.35±2.45   | 69.51±2.48*   | 91.42±3.29  |
| MCHC(g/L)          | 299.20±3.10  | 302.10±2.50  | 302.54±7.58   | 293.52±5.91 |
| MCH(pg)            | 15.75±0.05   | 15.91±0.16   | 15.75±1.15    | 15.45±0.15  |
| MPV(fL)            | 9.30±0.10    | 9.35±0.05    | 8.82±0.34     | 9.35±0.05   |
| PCT(%)             | 0.46±0.01    | 0.51±0.02    | 0.35±0.03     | 0.48±0.01   |

**Fig. S1** Standard curve of P-GM-2 detected by UPLC-MS/MS.

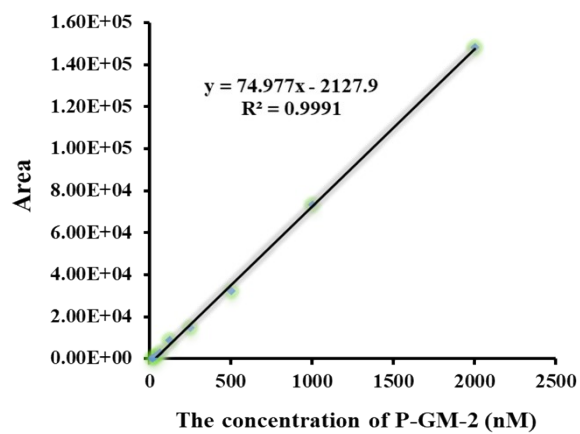

Supplement: d3fo04819e1.pdf [file d3fo04819e1.pdf]
